# Supplementary material for: Dynamics of Auxin and Cytokinin Metabolism during Early Root and Hypocotyl Growth in Theobroma cacao
Source: MDPI journal article supplement (doi:10.3390/plants10050967), 2021-05-12
Supplement: s1 [file s1]

## Supplementary Materials

**Table S1. List of the metabolites analysed in this study.** Metabolites in bold were below the limit of detection under our experimental conditions.

| <i>Phytohormone group</i> | <i>Abbreviations</i> | <i>Name</i>                                          |
|---------------------------|----------------------|------------------------------------------------------|
| Auxins                    | IAA                  | indole-3-acetic acid                                 |
|                           | oxIAA                | 2-oxindole-3-acetic acid                             |
|                           | IAAsp                | indole-3-acetyl-L-aspartic acid                      |
|                           | IAGlu                | indole-3-acetyl-glutamic acid                        |
| Isoprenoid cytokinins     | <i>tZ</i>            | <i>trans</i> -zeatin                                 |
|                           | <i>tZR</i>           | <i>trans</i> -zeatin riboside                        |
|                           | <i>tZRMP</i>         | <i>trans</i> -zeatin riboside-5'-monophosphate       |
|                           | <b><i>tZ9G</i></b>   | <b><i>trans</i>-zeatin-9-glucoside</b>               |
|                           | <b><i>tZ7G</i></b>   | <b><i>trans</i>-zeatin-7-glucoside</b>               |
|                           | <i>tZOG</i>          | <i>trans</i> -zeatin- <i>O</i> -glucoside            |
|                           | <i>tZROG</i>         | <i>trans</i> -zeatin riboside- <i>O</i> -glucoside   |
|                           | <b>DHZ</b>           | <b>dihydrozeatin</b>                                 |
|                           | <b>DHZR</b>          | <b>dihydrozeatin riboside</b>                        |
|                           | <b>DHZRMP</b>        | <b>dihydrozeatin riboside-5'-monophosphate</b>       |
|                           | <b>DHZ9G</b>         | <b>dihydrozeatin-9-glucoside</b>                     |
|                           | <b>DHZ7G</b>         | <b>dihydrozeatin-7-glucoside</b>                     |
|                           | DHZOG                | dihydrozeatin- <i>O</i> -glucoside                   |
|                           | <b>DHZROG</b>        | <b>dihydrozeatin riboside-<i>O</i>-glucoside</b>     |
|                           | <i>cZ</i>            | <i>cis</i> -zeatin                                   |
|                           | <b><i>cZR</i></b>    | <b><i>cis</i>-zeatin riboside</b>                    |
|                           | <b><i>cZRMP</i></b>  | <b><i>cis</i>-zeatin riboside-5'-monophosphate</b>   |
|                           | <b><i>cZ7G</i></b>   | <b><i>cis</i>-zeatin-7-glucoside</b>                 |
|                           | <b><i>cZ9G</i></b>   | <b><i>cis</i>-zeatin-9-glucoside</b>                 |
|                           | <i>cZOG</i>          | <i>cis</i> -zeatin- <i>O</i> -glucoside              |
|                           | <b><i>cZROG</i></b>  | <b><i>cis</i>-zeatin riboside-<i>O</i>-glucoside</b> |
|                           | iP                   | isopentenyladenine                                   |
|                           | iPR                  | isopentenyladenenosine                               |
|                           | iPRMP                | isopentenyladenosine-5'-monophosphate                |
|                           | <b>iP9G</b>          | <b>isopentenyladenine-9-glucoside</b>                |
|                           | iP7G                 | isopentenyladenine-7-glucoside                       |

**Table S2.** Levels of endogenous auxin metabolites (pmol g<sup>-1</sup> FW) in the hypocotyl and developmental root sections of cacao seedlings harvested at 4, 7 and 10 DAI. A, B, and C indicate the biological replicates. Mz = meristematic zone; Ez = elongation zone; Dz = differentiation zone bearing protrusions of lateral roots; mDz = mature differentiation zone; H = hypocotyl segment. A dash (-) indicates the absence of values as the mDz segment was not formed at day 4. FW = fresh weight.

| <i>DAI</i> |                    | <i>Content of IAA (pmol g<sup>-1</sup> FW) in different tissues</i>        |               |              |              |              | <i>Content of IAAsp (pmol g<sup>-1</sup> FW) in different tissues</i> |                |                |               |               |
|------------|--------------------|----------------------------------------------------------------------------|---------------|--------------|--------------|--------------|-----------------------------------------------------------------------|----------------|----------------|---------------|---------------|
|            |                    | <b>Mz</b>                                                                  | <b>Ez</b>     | <b>Dz</b>    | <b>mDz</b>   | <b>H</b>     | <b>Mz</b>                                                             | <b>Ez</b>      | <b>Dz</b>      | <b>mDz</b>    | <b>H</b>      |
| 4          | A                  | 310.96                                                                     | 378.47        | 116.81       | -            | 38.91        | 1505,88                                                               | 1208,06        | 1935,43        | -             | 764,28        |
|            | B                  | 339.33                                                                     | 134.72        | 106.88       | -            | 79.30        | 1289,25                                                               | 646,05         | 570,05         | -             | 285,47        |
|            | C                  | 159.92                                                                     | 88.24         | 66.61        | -            | 25.34        | 1202,31                                                               | 700,56         | 1373,12        | -             | 181,71        |
|            | <b>Mean values</b> | <b>270,07</b>                                                              | <b>200,48</b> | <b>96,77</b> | <b>-</b>     | <b>47,85</b> | <b>1332,48</b>                                                        | <b>851,56</b>  | <b>1292,86</b> | <b>-</b>      | <b>410,48</b> |
| 7          | A                  | 224.55                                                                     | 75.93         | 67.963       | 52.317       | 34.261       | 1112,34                                                               | 1405,85        | 1153,35        | 562,88        | 783,08        |
|            | B                  | 204.19                                                                     | 152.43        | 117.506      | 72.051       | 100.062      | 357,33                                                                | 300,05         | 449,54         | 732,35        | 36,06         |
|            | C                  | 206.60                                                                     | 89.45         | 99.831       | 34.703       | 45.686       | 702,107                                                               | 859,52         | 903,77         | 769,38        | 514,56        |
|            | <b>Mean values</b> | <b>211,78</b>                                                              | <b>105,94</b> | <b>95,09</b> | <b>53,02</b> | <b>60,00</b> | <b>723,93</b>                                                         | <b>855,14</b>  | <b>835,55</b>  | <b>688,20</b> | <b>444,57</b> |
| 10         | A                  | 18.39                                                                      | 36.46         | 90.07        | 19.45        | 8.77         | 1309,87                                                               | 2616,56        | 614,59         | 2386,31       | 703,50        |
|            | B                  | 20.87                                                                      | 29.37         | 77.84        | 37.93        | 29.95        | 2249,92                                                               | 1053,08        | 1515,12        | 102,22        | 145,18        |
|            | C                  | 19.38                                                                      | 14.69         | 32.77        | 21.40        | 18.32        | 2030,387                                                              | 1255,11        | 1195,28        | 337,36        | 187,63        |
|            | <b>Mean values</b> | <b>19,54</b>                                                               | <b>26,84</b>  | <b>66,89</b> | <b>26,26</b> | <b>19,01</b> | <b>1863,39</b>                                                        | <b>1641,59</b> | <b>1108,33</b> | <b>941,96</b> | <b>345,44</b> |
|            |                    | <i>Content of free IAGlu (pmol g<sup>-1</sup> FW) in different tissues</i> |               |              |              |              | <i>Content of oxIAA (pmol g<sup>-1</sup> FW) in different tissues</i> |                |                |               |               |
|            |                    | <b>Mz</b>                                                                  | <b>Ez</b>     | <b>Dz</b>    | <b>mDz</b>   | <b>H</b>     | <b>Mz</b>                                                             | <b>Ez</b>      | <b>Dz</b>      | <b>mDz</b>    | <b>H</b>      |
| 4          | A                  | 10.20                                                                      | 14.17         | 32.18        | -            | 5.39         | 13.42                                                                 | 16.01          | 1.86           | -             | 1.14          |
|            | B                  | 6.60                                                                       | 4.05          | 14.17        | -            | 1.56         | 8.20                                                                  | 6.74           | 5.62           | -             | 4.34          |
|            | C                  | 7.17                                                                       | 5.49          | 34.69        | -            | 1.46         | 6.85                                                                  | 12.39          | 10.80          | -             | 8.48          |
|            | <b>Mean values</b> | <b>7.99</b>                                                                | <b>7.90</b>   | <b>27.01</b> | <b>-</b>     | <b>2.80</b>  | <b>9.49</b>                                                           | <b>11.71</b>   | <b>6.09</b>    | <b>-</b>      | <b>4.65</b>   |
| 7          | A                  | 29.84                                                                      | 37.76         | 27.76        | 42.57        | 6.96         | 3.00                                                                  | 1.78           | 3.18           | 1.70          | 1.22          |
|            | B                  | 2.79                                                                       | 6.24          | 6.22         | 15.45        | 6.31         | 9.38                                                                  | 8.79           | 7.59           | 3.22          | 7.46          |
|            | C                  | 7.24                                                                       | 12.17         | 13.09        | 14.77        | 5.36         | 8.74                                                                  | 4.63           | 2.95           | 3.22          | 1.66          |
|            | <b>Mean values</b> | <b>13.29</b>                                                               | <b>18.72</b>  | <b>15.69</b> | <b>24.26</b> | <b>6.21</b>  | <b>7.04</b>                                                           | <b>5.07</b>    | <b>4.58</b>    | <b>2.71</b>   | <b>3.45</b>   |
| 10         | A                  | 15.62                                                                      | 38.46         | 18.07        | 48.97        | 7.47         | 16.75                                                                 | 23.05          | 54.83          | 16.74         | 8.69          |
|            | B                  | 48.67                                                                      | 20.59         | 39.22        | 12.63        | 9.10         | 21.23                                                                 | 21.34          | 53.60          | 21.05         | 12.21         |
|            | C                  | 72.87                                                                      | 51.80         | 25.46        | 13.77        | 7.72         | 20.20                                                                 | 19.94          | 29.13          | 24.65         | 12.98         |
|            | <b>Mean values</b> | <b>45.72</b>                                                               | <b>36.95</b>  | <b>27.58</b> | <b>25.12</b> | <b>8.10</b>  | <b>19.39</b>                                                          | <b>21.44</b>   | <b>45.85</b>   | <b>20.81</b>  | <b>11.30</b>  |

**Table S3.** Levels of endogenous cytokinins (pmol/g fresh weight) in the hypocotyl and developmental root sections of cacao seedlings harvested at 4, 7 and 10 DAI. A, B, and C indicate the biological replicates. “<LOD” indicates values below the limit of detection of UHPLC-MS/MS method used. Mz = meristematic zone; Ez = elongation zone; Dz = differentiation zone bearing protrusions of lateral roots; mDz = mature differentiation zone; H = hypocotyl segment. A dash (-) indicates the absence of values as the mDz segment was not formed at day 4. FW = fresh weight.

| <i>DAI</i> | <i>Plant tissue</i> |             | iP           | iPR          | iP7G         | iPRMP        | <i>t</i> Z   | <i>t</i> ZR  | <i>t</i> ZOG | <i>t</i> ZROG | <i>t</i> ZR5'MP | DHZOG        | <i>c</i> Z   | <i>c</i> ZOG |
|------------|---------------------|-------------|--------------|--------------|--------------|--------------|--------------|--------------|--------------|---------------|-----------------|--------------|--------------|--------------|
| 4          | Mz                  | A           | 1.652        | 4.351        | 0.930        | 1.612        | 0.044        | 0.206        | <LOD         | 0.040         | 0.708           | 0.006        | 0.011        | <LOD         |
|            |                     | B           | 1.680        | 4.599        | 0.230        | 2.062        | 0.091        | 0.641        | 0.071        | 0.065         | 1.796           | <LOD         | 0.011        | <LOD         |
|            |                     | C           | 0.735        | 2.383        | 0.089        | 0.807        | 0.082        | 0.371        | 0.150        | 0.051         | 1.230           | 0.002        | <LOD         | <LOD         |
|            |                     | Mean values | <b>1.355</b> | <b>3.778</b> | <b>0.416</b> | <b>1.493</b> | <b>0.073</b> | <b>0.406</b> | <b>0.110</b> | <b>0.052</b>  | <b>1.245</b>    | <b>0.004</b> | <b>0.011</b> | <LOD         |
|            | Ez                  | A           | 1.059        | 2.411        | 0.377        | 1.429        | 0.288        | 1.688        | 0.257        | 0.077         | 5.170           | 0.008        | 0.015        | <LOD         |
|            |                     | B           | 0.332        | 2.887        | 0.223        | 0.636        | 0.109        | 1.475        | 0.078        | 0.019         | 1.867           | 0.003        | 0.012        | <LOD         |
|            |                     | C           | 0.623        | 2.321        | 0.230        | 0.423        | 0.145        | 0.913        | 0.421        | 0.065         | 1.368           | 0.004        | <LOD         | <LOD         |
|            |                     | Mean values | <b>0.671</b> | <b>2.539</b> | <b>0.277</b> | <b>0.830</b> | <b>0.181</b> | <b>1.359</b> | <b>0.252</b> | <b>0.054</b>  | <b>2.802</b>    | <b>0.005</b> | <b>0.014</b> | <LOD         |
|            | Dz                  | A           | <LOD         | <LOD         | 0.510        | 0.297        | 0.399        | 1.212        | 0.720        | 0.086         | 1.721           | 0.097        | 0.014        | <LOD         |
|            |                     | B           | 0.505        | 1.651        | 0.088        | 0.604        | 0.296        | 1.392        | 0.438        | 0.059         | 2.378           | 0.012        | 0.005        | <LOD         |
|            |                     | C           | 0.707        | 2.964        | 0.143        | 0.915        | 0.257        | 0.825        | 0.435        | 0.066         | 1.945           | 0.024        | <LOD         | <LOD         |
|            |                     | Mean values | <b>0.606</b> | <b>2.308</b> | <b>0.247</b> | <b>0.605</b> | <b>0.318</b> | <b>1.143</b> | <b>0.531</b> | <b>0.070</b>  | <b>2.014</b>    | <b>0.045</b> | <b>0.010</b> | <LOD         |
|            | H                   | A           | 0.322        | 0.690        | 0.155        | 0.196        | 0.809        | 1.471        | 0.881        | 0.082         | 4.094           | 0.056        | <LOD         | <LOD         |
|            |                     | B           | 0.299        | 1.729        | 0.133        | 0.416        | 0.612        | 2.055        | 0.357        | 0.059         | 4.731           | 0.009        | <LOD         | <LOD         |
|            |                     | C           | 0.141        | 1.116        | <LOD         | 0.162        | 0.561        | 1.470        | 0.646        | 0.072         | 3.202           | 0.022        | <LOD         | <LOD         |
|            |                     | Mean values | <b>0.254</b> | <b>1.178</b> | <b>0.144</b> | <b>0.258</b> | <b>0.661</b> | <b>1.665</b> | <b>0.628</b> | <b>0.071</b>  | <b>4.009</b>    | <b>0.029</b> | <LOD         | <LOD         |
| 7          | Mz                  | A           | 0.454        | 1.817        | 0.097        | 0.548        | 0.116        | 1.361        | 0.296        | 0.033         | 2.364           | 0.005        | <LOD         | <LOD         |
|            |                     | B           | 0.905        | 1.954        | 0.149        | 0.627        | 0.244        | 0.726        | 0.199        | 0.029         | 1.856           | 0.007        | <LOD         | <LOD         |
|            |                     | C           | 0.915        | 2.838        | 0.063        | 0.406        | 0.226        | 0.850        | 0.363        | 0.026         | 2.279           | 0.006        | 0.002        | <LOD         |
|            |                     | Mean values | <b>0.758</b> | <b>2.203</b> | <b>0.103</b> | <b>0.527</b> | <b>0.196</b> | <b>0.979</b> | <b>0.286</b> | <b>0.029</b>  | <b>2.167</b>    | <b>0.006</b> | <b>0.002</b> | <LOD         |
|            | Ez                  | A           | 0.265        | 1.237        | 0.102        | 0.143        | 0.183        | 1.562        | 1.707        | 0.067         | 1.878           | 0.015        | <LOD         | <LOD         |
|            |                     | B           | 0.759        | 1.567        | 1.236        | 0.331        | 0.295        | 1.802        | 1.286        | 0.066         | 2.801           | 0.010        | 0.086        | <LOD         |
|            |                     | C           | 0.724        | 2.721        | 0.095        | 0.444        | 0.357        | 2.812        | 0.943        | 0.049         | 2.938           | 0.012        | 0.047        | <LOD         |
|            |                     | Mean values | <b>0.583</b> | <b>1.841</b> | <b>0.478</b> | <b>0.306</b> | <b>0.278</b> | <b>2.058</b> | <b>1.312</b> | <b>0.061</b>  | <b>2.539</b>    | <b>0.013</b> | <b>0.067</b> | <LOD         |

Table S3 Continued

| <i>DAI</i> | <i>Plant tissue</i> |             | iP           | iPR          | iP7G         | iPRMP        | <i>tZ</i>    | <i>tZR</i>   | <i>tZOG</i>  | <i>tZROG</i> | <i>tZR5'MP</i> | DHZOG        | <i>cZ</i>    | <i>cZOG</i>  |
|------------|---------------------|-------------|--------------|--------------|--------------|--------------|--------------|--------------|--------------|--------------|----------------|--------------|--------------|--------------|
| 7          | <b>Dz</b>           | A           | 0.453        | 0.927        | 0.075        | 0.169        | 0.114        | 1.347        | 0.988        | 0.076        | 1.027          | 0.032        | 0.018        | <LOD         |
|            |                     | B           | 0.492        | 1.462        | 0.067        | 0.259        | 0.371        | 1.819        | 0.640        | 0.071        | 1.216          | 0.019        | <LOD         | <LOD         |
|            |                     | C           | 0.002        | <LOD         | 0.104        | 0.212        | 0.223        | 0.978        | 0.392        | 0.037        | 1.199          | 0.009        | 0.001        | <LOD         |
|            |                     | Mean values | <b>0.316</b> | <b>1.195</b> | <b>0.082</b> | <b>0.213</b> | <b>0.236</b> | <b>1.381</b> | <b>0.674</b> | <b>0.061</b> | <b>1.148</b>   | <b>0.020</b> | <b>0.009</b> | <LOD         |
|            | <b>mDz</b>          | A           | 0.390        | 1.811        | 0.281        | 0.208        | 0.122        | 3.229        | 1.597        | 0.100        | 1.657          | 0.035        | 0.008        | <LOD         |
|            |                     | B           | 1.057        | 2.881        | 0.312        | 0.416        | 0.328        | 2.969        | 1.224        | 0.100        | 1.908          | 0.028        | <LOD         | <LOD         |
|            |                     | C           | 0.995        | 2.212        | 0.417        | 0.344        | 0.374        | 2.529        | 1.458        | 0.054        | 2.468          | 0.030        | <LOD         | <LOD         |
|            |                     | Mean values | <b>0.814</b> | <b>2.301</b> | <b>0.337</b> | <b>0.323</b> | <b>0.275</b> | <b>2.909</b> | <b>1.426</b> | <b>0.084</b> | <b>2.011</b>   | <b>0.031</b> | <b>0.008</b> | <LOD         |
|            | <b>H</b>            | A           | 0.356        | 0.911        | 0.060        | 0.335        | 0.312        | 0.892        | 0.489        | 0.060        | 2.193          | 0.015        | <LOD         | <LOD         |
|            |                     | B           | 0.250        | 0.475        | 0.011        | 0.307        | 0.725        | 2.567        | 0.955        | 0.069        | 4.765          | 0.016        | 0.188        | <LOD         |
|            |                     | C           | 0.226        | 1.167        | 0.312        | 0.307        | 0.604        | 1.677        | 0.482        | 0.058        | 4.223          | 0.007        | 0.111        | <LOD         |
|            |                     | Mean values | <b>0.277</b> | <b>0.851</b> | <b>0.128</b> | <b>0.317</b> | <b>0.547</b> | <b>1.712</b> | <b>0.642</b> | <b>0.062</b> | <b>3.727</b>   | <b>0.013</b> | <b>0.150</b> | <LOD         |
| 10         | <b>Mz</b>           | A           | <LOD         | 3.746        | <LOD         | 0.047        | 0.039        | 0.272        | 0.462        | <LOD         | <LOD           | 0.011        | 0.034        | 0.0000       |
|            |                     | B           | 0.423        | 1.419        | 0.216        | 0.193        | 0.068        | 0.282        | 3.064        | 0.206        | 0.889          | 0.025        | 0.043        | 0.0044       |
|            |                     | C           | 0.192        | 1.039        | 0.322        | 0.220        | 0.058        | 0.294        | 1.094        | 0.074        | 1.266          | 0.008        | <LOD         | 0.1164       |
|            |                     | Mean values | <b>0.308</b> | <b>2.068</b> | <b>0.269</b> | <b>0.127</b> | <b>0.055</b> | <b>0.283</b> | <b>1.540</b> | <b>0.140</b> | <b>1.077</b>   | <b>0.015</b> | <b>0.038</b> | <b>0.040</b> |
|            | <b>Ez</b>           | A           | 0.497        | 1.864        | 0.232        | 0.160        | 0.232        | 1.756        | 3.871        | 0.280        | 5.862          | 0.043        | 0.022        | 0.0000       |
|            |                     | B           | 0.389        | 0.645        | 0.174        | 0.047        | 0.044        | 0.252        | 1.419        | 0.080        | 0.568          | 0.009        | 0.051        | 0.0170       |
|            |                     | C           | 0.160        | 1.077        | 0.477        | 0.174        | 0.121        | 0.588        | 2.500        | 0.120        | 1.864          | 0.019        | 0.011        | 0.6060       |
|            |                     | Mean values | <b>0.349</b> | <b>1.195</b> | <b>0.294</b> | <b>0.127</b> | <b>0.132</b> | <b>0.865</b> | <b>2.597</b> | <b>0.160</b> | <b>2.765</b>   | <b>0.024</b> | <b>0.028</b> | <b>0.208</b> |
|            | <b>Dz</b>           | A           | 0.686        | 0.940        | 0.173        | 0.044        | 0.197        | 1.394        | 1.876        | 0.106        | 2.565          | 0.031        | 0.022        | 0.0000       |
|            |                     | B           | 1.369        | 1.550        | 0.299        | 0.148        | 0.086        | 0.247        | 1.375        | 0.123        | <LOD           | 0.019        | 0.141        | 0.0575       |
|            |                     | C           | 0.243        | 0.797        | 0.156        | 0.076        | 0.089        | 0.407        | 1.481        | 0.105        | 1.206          | 0.023        | 0.015        | 0.9674       |
|            |                     | Mean values | <b>0.766</b> | <b>1.095</b> | <b>0.209</b> | <b>0.089</b> | <b>0.124</b> | <b>0.683</b> | <b>1.577</b> | <b>0.111</b> | <b>1.886</b>   | <b>0.024</b> | <b>0.059</b> | <b>0.342</b> |
|            | <b>mDz</b>          | A           | 1.622        | 2.243        | 0.528        | 0.174        | 0.088        | 0.294        | 2.876        | 0.147        | 0.379          | 0.018        | 0.116        | 0.0000       |
|            |                     | B           | 0.202        | 1.197        | 0.539        | 0.106        | 0.102        | 0.539        | 3.370        | 0.232        | 2.013          | 0.026        | 0.045        | 0.0377       |
|            |                     | C           | 0.506        | 1.094        | 0.177        | 0.054        | 0.145        | 1.256        | 3.290        | 0.142        | 2.083          | 0.028        | 0.030        | 0.5942       |
|            |                     | Mean values | <b>0.777</b> | <b>1.511</b> | <b>0.415</b> | <b>0.111</b> | <b>0.111</b> | <b>0.696</b> | <b>3.179</b> | <b>0.173</b> | <b>2.765</b>   | <b>0.024</b> | <b>0.063</b> | <b>0.211</b> |
|            | <b>H</b>            | A           | 0.186        | 1.197        | 0.040        | 0.155        | 0.015        | 0.067        | 0.368        | 0.057        | <LOD           | 0.005        | 0.008        | 0.0000       |
|            |                     | B           | 0.554        | 1.580        | 0.264        | 0.130        | 0.313        | 1.519        | 2.362        | 0.189        | 3.273          | 0.053        | 0.019        | 0.0046       |
|            |                     | C           | 0.184        | 1.555        | 0.163        | 0.263        | 0.128        | 0.857        | 0.930        | 0.156        | 2.945          | 0.008        | 0.012        | 0.3500       |
|            |                     | Mean values | <b>0.308</b> | <b>1.444</b> | <b>0.156</b> | <b>0.183</b> | <b>0.152</b> | <b>0.815</b> | <b>1.220</b> | <b>0.134</b> | <b>3.109</b>   | <b>0.022</b> | <b>0.013</b> | <b>0.118</b> |
